# Supplementary material
Source: PubMed Central journal article supplement (PMC9209574)

**SUPPLEMENTAL FIGURE 1**

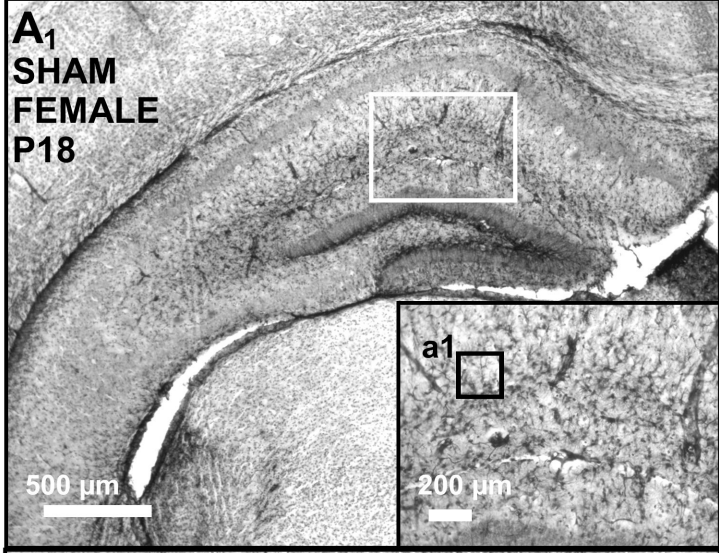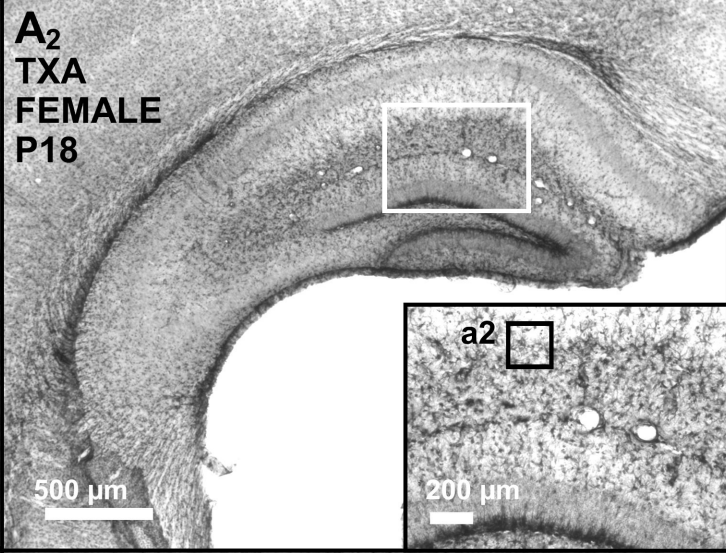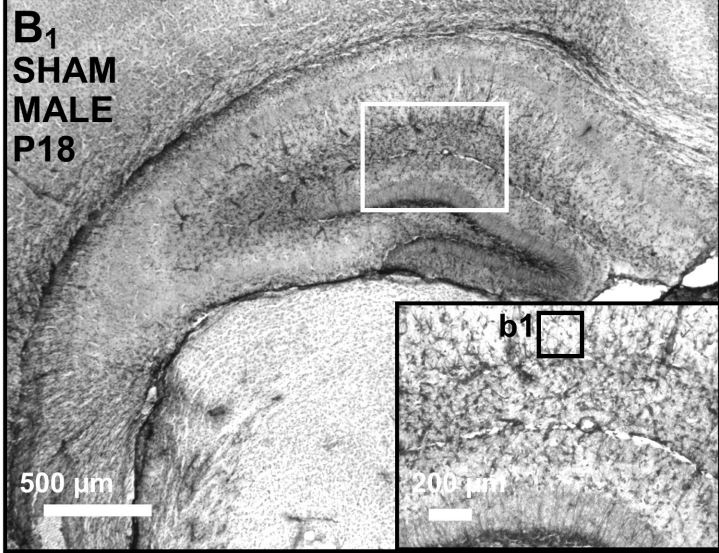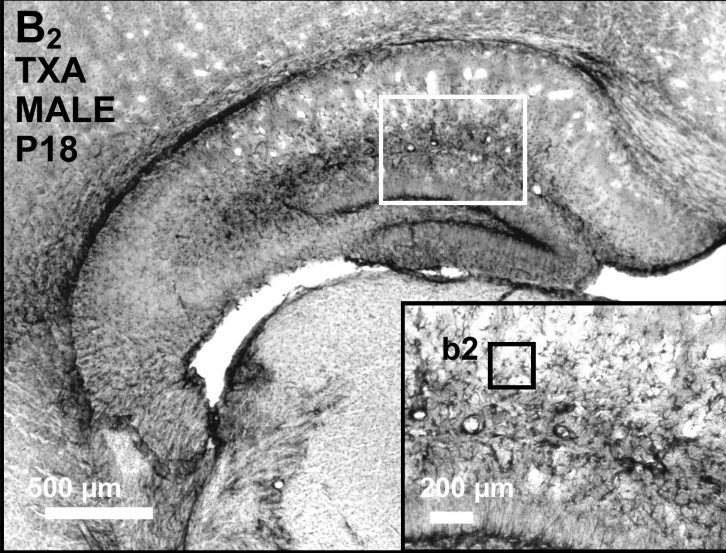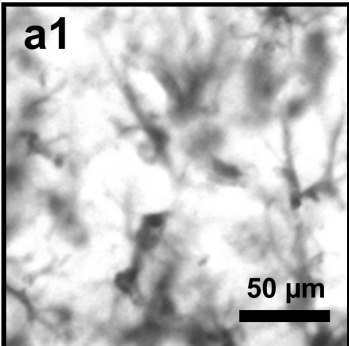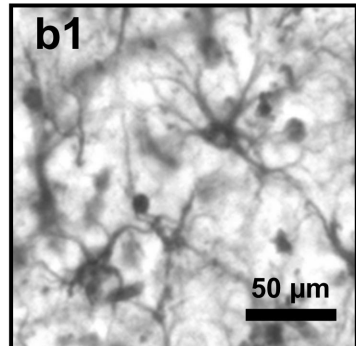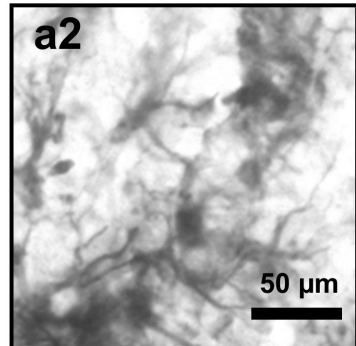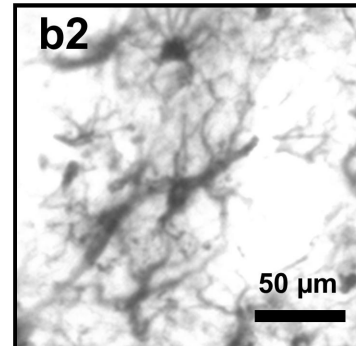

# SUPPLEMENTAL FIGURE 2

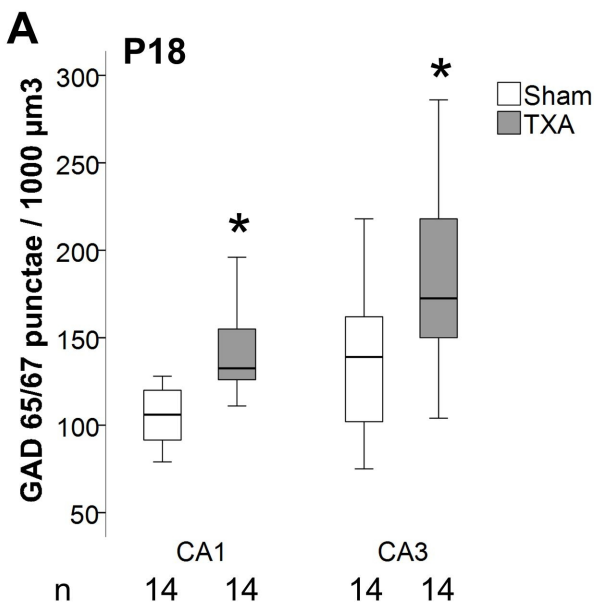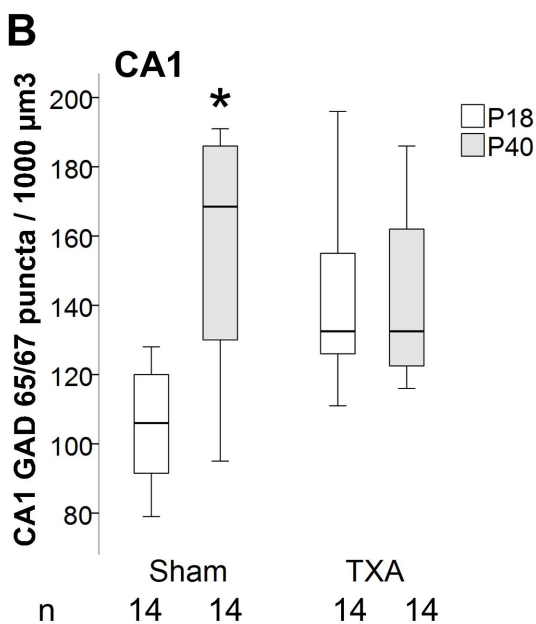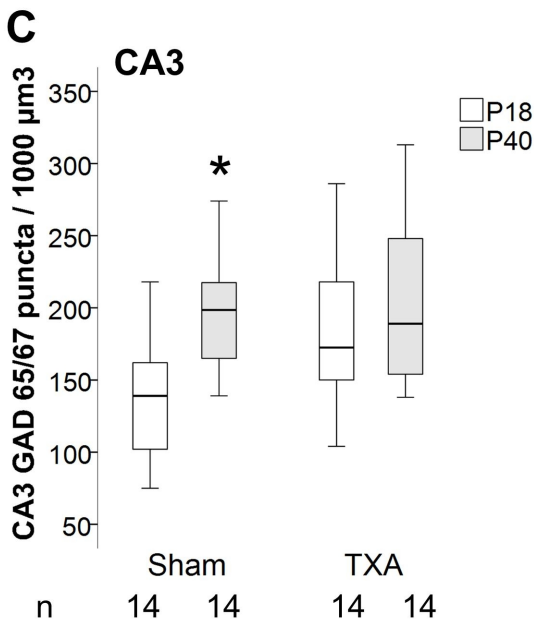

# SUPPLEMENTAL FIGURE 3

## A

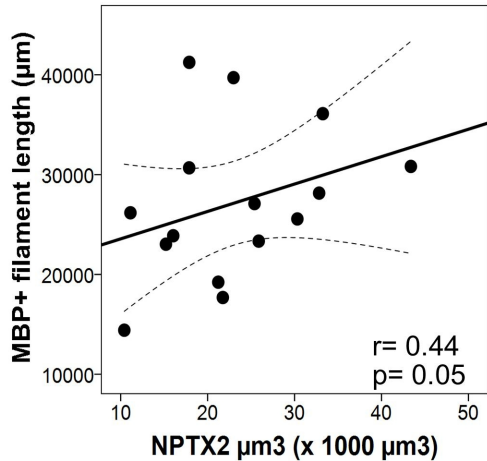

## B

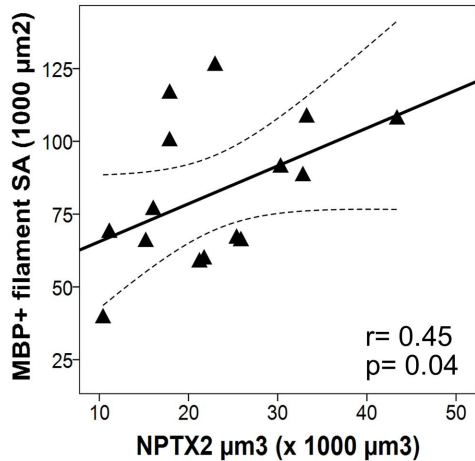

## C

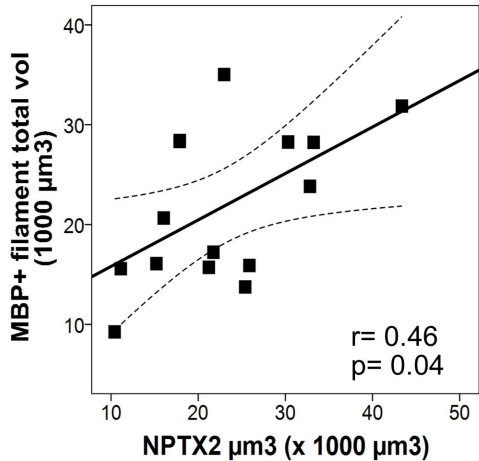

Supplement: NIHMS1773153-supplement-1.pdf [file NIHMS1773153-supplement-1.pdf]
